# Supplementary material
Source: PubMed Central journal article supplement (PMC5555165)
Supplement: NIHMS882681-supplement-supplement_1.pdf [file NIHMS882681-supplement-supplement_1.pdf]

## **Table S1 Selecting predictors for composite regression models<sup>a</sup>**

---

<sup>a</sup> Associations of all predictors in a domain with outcomes were tested in a first step. Associations of  $p < .05$  were included in the main regression analyses

| BASELINE FACTORS                  | OUTCOMES                                                      |                                 |                                |
|-----------------------------------|---------------------------------------------------------------|---------------------------------|--------------------------------|
|                                   | Occupational functioning                                      |                                 |                                |
|                                   | Public assistance<br>OR <sup>b</sup> (SE) <sup>c</sup> ,<br>p | Job changes<br>OR (SE),<br>p    | Income levels<br>OR (SE),<br>p |
| <b>I. Demographic factors</b>     |                                                               |                                 |                                |
| Household income                  | <b>0.83 (.04),<br/>&lt;.001</b>                               | 0.98 (.01),<br>.21              | <b>1.09 (.03),<br/>.003</b>    |
| Parental education                | 0.92 (.10),<br>.40                                            | 1.03 (.03),<br>.42              | 1.06 (.07),<br>.36             |
| Total household members           | 0.93 (.07),<br>.33                                            | 0.97 (.02),<br>.42              | 0.96 (.04),<br>.47             |
| <b>II. Clinical factors</b>       |                                                               |                                 |                                |
| IQ                                | <b>0.97 (.01),<br/>&lt;.001</b>                               | <b>1.01 (.002),<br/>.001</b>    | <b>1.01 (.004),<br/>.001</b>   |
| Comorbidity                       | 1.08 (.06),<br>.16                                            | 0.96 (.02),<br>.12              | <b>0.86 (.04),<br/>.002</b>    |
| ADHD symptom severity             | <b>1.39 (.14),<br/>.019</b>                                   | <b>1.22 (.04),<br/>&lt;.001</b> | 0.98 (.09),<br>.89             |
| <b>III. Family factors</b>        |                                                               |                                 |                                |
| <b>Parenting styles</b>           |                                                               |                                 |                                |
| Positive parenting                | 0.92 (.17),<br>.67                                            | 0.93 (.06),<br>.26              | 0.96 (.11),<br>.76             |
| Inconsistent discipline           | 1.03 (.15),<br>.84                                            | 1.03 (.05),<br>.54              | 0.88 (.10),<br>.23             |
| Low monitoring and supervision    | 1.09 (.16),<br>.57                                            | 0.97 (.06),<br>.63              | 1.03 (.11),<br>.73             |
| Harsh discipline                  | 1.29 (.13),<br>.06                                            | 1.01 (.05),<br>.80              | <b>0.80 (.09),<br/>.02</b>     |
| Appropriate discipline            | 0.86 (.15),<br>.33                                            | 1.03 (.05),<br>.55              | 1.09 (.10),<br>.38             |
| Parental involvement              | 1.03 (.19),<br>.85                                            | 1.02 (.07),<br>.72              | 1.04 (.13),<br>.75             |
| <b>Parent-child relationships</b> |                                                               |                                 |                                |
| Possessive and protective         | 1.15 (.15),<br>.37                                            | 1.03 (.05),<br>.52              | 0.86 (.10),<br>.18             |
| Affectionate and admiring         | 0.70 (.19),<br>.07                                            | 0.95 (.07),<br>.49              | <b>1.32 (.14),<br/>.047</b>    |
| Conflicting                       | 0.77 (.17),<br>.15                                            | 1.04 (.06),<br>.45              | 1.01 (.11),<br>.92             |
| Nurturing and intimate            | 0.78 (.22),<br>.29                                            | 0.94 (.08),<br>.49              | 0.79 (.15),<br>.13             |
| Participating and involved        | 0.98 (.21),<br>.92                                            | 1.01 (.07),<br>.80              | 1.19 (.15),<br>.22             |

---

<sup>b</sup> Odds ratio

<sup>c</sup> Standard error

| <b>Parental marital problems</b>  | 1.07 (.06),<br>.28                    | 0.99 (.03),<br>.74                 | 0.93 (.05),<br>.19                    |                                   |
|-----------------------------------|---------------------------------------|------------------------------------|---------------------------------------|-----------------------------------|
| <b>Emotional functioning</b>      |                                       |                                    |                                       |                                   |
|                                   | Emotional<br>lability<br>B (SE),<br>p | Mood<br>disorders<br>OR (SE),<br>p | Anxiety<br>disorders<br>OR (SE),<br>p | Neuroticism<br>B (SE),<br>p       |
| <b>I. Demographic factors</b>     |                                       |                                    |                                       |                                   |
| Household income                  | <b>-0.03 (.01),<br/>&lt;.001</b>      | 1.01 (.06),<br>.82                 | 0.92 (.04),<br>.058                   | -0.01 (.01),<br>.49               |
| Parental education                | 0.02 (.02),<br>.21                    | .99 (.14),<br>.99                  | 1.16 (.10),<br>.13                    | -0.03 (.02),<br>.11               |
| Total household members           | -0.01 (.01),<br>.43                   | 1.10 (.09),<br>.26                 | 1.08 (.06),<br>.20                    | -0.01 (.01),<br>.73               |
| <b>II. Clinical factors</b>       |                                       |                                    |                                       |                                   |
| IQ                                | -0.001 (.001),<br>.55                 | <b>1.02 (.01),<br/>.007</b>        | 0.99 (.01),<br>.57                    | <b>-0.01 (.001),<br/>&lt;.001</b> |
| Comorbidity                       | <b>0.06 (.01),<br/>&lt;.001</b>       | 1.03 (.09),<br>.72                 | 1.03 (.06),<br>.57                    | <b>0.03 (.01),<br/>.041</b>       |
| ADHD symptom severity             | <b>0.21 (.02),<br/>&lt;.001</b>       | 1.36 (.20),<br>.12                 | 1.10 (.13),<br>.43                    | 0.01 (.03),<br>.60                |
| <b>III. Family factors</b>        |                                       |                                    |                                       |                                   |
| <b>Parenting styles</b>           |                                       |                                    |                                       |                                   |
| Positive parenting                | 0.004 (.03),<br>.91                   | 0.87 (.24),<br>.59                 | 0.73 (.17),<br>.07                    | -0.03 (.04),<br>.42               |
| Inconsistent discipline           | 0.05 (.03),<br>.09                    | 0.95 (.21),<br>.80                 | 1.09 (.15),<br>.55                    | 0.05 (.03),<br>.11                |
| Low monitoring and supervision    | 0.01 (.03),<br>.61                    | 0.99 (.23),<br>.97                 | 0.95 (.16),<br>.72                    | -0.01 (.04),<br>.88               |
| Harsh discipline                  | <b>0.07 (.02),<br/>.014</b>           | 0.99 (.19),<br>.96                 | 1.05 (.13),<br>.69                    | 0.03 (.03),<br>.29                |
| Appropriate discipline            | -0.03 (.03),<br>.27                   | 1.06 (.21),<br>.74                 | 1.003 (.15),<br>.98                   | -0.02 (.03),<br>.56               |
| Parental involvement              | -0.06 (.04),<br>.11                   | 1.19 (.29),<br>.52                 | <b>1.61 (.20),<br/>.019</b>           | 0.02 (.04),<br>.54                |
| <b>Parent-child relationships</b> |                                       |                                    |                                       |                                   |
| Possessive and protective         | 0.01 (.03),<br>.66                    | 1.52 (.22),<br>.055                | 1.27 (.15),<br>.11                    | <b>0.09 (.03),<br/>.010</b>       |
| Affectionate and admiring         | -0.06 (.04),<br>.15                   | 0.82 (.26),<br>.47                 | 0.93 (.20),<br>.70                    | <b>-0.13 (.05),<br/>.008</b>      |
| Conflicting                       | 0.06 (.06),<br>.11                    | 1.08 (.24),<br>.72                 | 0.94 (.17),<br>.69                    | 0.01 (.04),<br>.89                |
| Nurturing and intimate            | 0.08 (.04),<br>.09                    | 0.58 (.32),<br>.09                 | 0.90 (.22),<br>.64                    | -0.02 (.05),<br>.61               |
| Participating and involved        | -0.16 (.04),<br>.72                   | 1.04 (.29),<br>.89                 | 0.82 (.21),<br>.36                    | -0.01 (.05),<br>.82               |

|                                                                |                                 |                    |                    |                    |
|----------------------------------------------------------------|---------------------------------|--------------------|--------------------|--------------------|
| <b>Parental marital problems</b>                               | 0.03 (.01),<br>.051             | 0.69 (.25),<br>.14 | 1.02 (.07),<br>.71 | 0.02 (.02),<br>.27 |
| Educational attainment<br>(Bachelor's degree)<br>OR (SE),<br>P |                                 |                    |                    |                    |
| <b>I. Demographic factors</b>                                  |                                 |                    |                    |                    |
| Household income                                               | <b>1.16 (.03),<br/>&lt;.001</b> |                    |                    |                    |
| Parental education                                             | <b>1.61 (.08),<br/>&lt;.001</b> |                    |                    |                    |
| Total household members                                        | 0.89 (.06),<br>.08              |                    |                    |                    |
| <b>II. Clinical factors</b>                                    |                                 |                    |                    |                    |
| IQ                                                             | <b>1.03 (.01),<br/>&lt;.001</b> |                    |                    |                    |
| Comorbidity                                                    | 0.96 (.05),<br>.58              |                    |                    |                    |
| ADHD <sup>d</sup> symptom severity                             | <b>0.64 (.11),<br/>&lt;.001</b> |                    |                    |                    |
| <b>III. Family factors</b>                                     |                                 |                    |                    |                    |
| <b>Parenting styles</b>                                        |                                 |                    |                    |                    |
| Positive parenting                                             | 0.82 (.14),<br>.17              |                    |                    |                    |
| Inconsistent discipline                                        | 1.06 (.12),<br>.62              |                    |                    |                    |
| Low monitoring and supervision                                 | <b>0.62 (.13),<br/>.001</b>     |                    |                    |                    |
| Harsh discipline                                               | 0.90 (.11),<br>.37              |                    |                    |                    |
| Appropriate discipline                                         | 0.84 (.12),<br>.18              |                    |                    |                    |
| Parental involvement                                           | 1.20 (.16),<br>.24              |                    |                    |                    |
| <b>Parent-child relationships</b>                              |                                 |                    |                    |                    |
| Possessive and protective                                      | 0.86 (.13),<br>.27              |                    |                    |                    |
| Affectionate and admiring                                      | 1.06 (.16),<br>.68              |                    |                    |                    |
| Conflicting                                                    | 0.93 (.14),<br>.66              |                    |                    |                    |
| Nurturing and intimate                                         | 0.76 (.18),<br>.14              |                    |                    |                    |
| Participating and involved                                     | 1.23 (.17),<br>.22              |                    |                    |                    |
| <b>Parental marital problems</b>                               | <b>0.60 (.13),<br/>&lt;.001</b> |                    |                    |                    |

---

<sup>d</sup> Attention-Deficit/Hyperactivity Disorder

|                                   | Sexual behavior                                       |                                        |
|-----------------------------------|-------------------------------------------------------|----------------------------------------|
|                                   | Age at 1 <sup>st</sup> sexual contact<br>B (SE),<br>p | Total sexual partners<br>OR (SE),<br>p |
| <b>I. Demographic factors</b>     |                                                       |                                        |
| Household income                  | <b>0.16 (.04),<br/>&lt;.001</b>                       | <b>0.97 (.01),<br/>.014</b>            |
| Parental education                | <b>0.22 (.10),<br/>.038</b>                           | 1.01 (.02),<br>.67                     |
| Total household members           | <b>0.19 (.07),<br/>.015</b>                           | <b>0.90 (.01),<br/>&lt;.001</b>        |
| <b>II. Clinical factors</b>       |                                                       |                                        |
| IQ                                | <b>0.01 (.01),<br/>.039</b>                           | 0.99 (.002),<br>.16                    |
| Comorbidity                       | -0.04 (.06),<br>.53                                   | <b>0.96 (.01),<br/>.027</b>            |
| ADHD symptom severity             | <b>-0.56 (.13),<br/>&lt;.001</b>                      | <b>1.24 (.03),<br/>&lt;.001</b>        |
| <b>III. Family factors</b>        |                                                       |                                        |
| <b>Parenting styles</b>           |                                                       |                                        |
| Positive parenting                | 0.15 (.17),<br>.37                                    | <b>0.92 (.03),<br/>.028</b>            |
| Inconsistent discipline           | -0.23 (.15),<br>.13                                   | 1.05 (.03),<br>.08                     |
| Low monitoring and supervision    | -0.13 (.16),<br>.40                                   | 1.03 (.03),<br>.33                     |
| Harsh discipline                  | -0.23 (.14),<br>.10                                   | 1.004 (.03),<br>.91                    |
| Appropriate discipline            | 0.14 (.15),<br>.35                                    | 0.93 (.03),<br>.057                    |
| Parental involvement              | 0.02 (.20),<br>.91                                    | <b>0.90 (.03),<br/>.007</b>            |
| <b>Parent-child relationships</b> |                                                       |                                        |
| Possessive and protective         | <b>-0.33 (.16),<br/>.036</b>                          | 0.95 (.03),<br>.28                     |
| Affectionate and admiring         | 0.09 (.20),<br>.62                                    | 0.99 (.04),<br>.88                     |
| Conflicting                       | -0.10 (.19),<br>.59                                   | <b>1.12 (.04),<br/>.011</b>            |
| Nurturing and intimate            | -0.27 (.22),<br>.22                                   | <b>1.15 (.05),<br/>.009</b>            |
| Participating and involved        | 0.09 (.20),<br>.65                                    | 1.03 (.05),<br>.49                     |
| <b>Parental marital problems</b>  | <b>-0.16 (.08),<br/>.049</b>                          | <b>1.04 (.01),<br/>&lt;.001</b>        |

|                                   | Justice involvement<br>(Police contact)<br>OR (SE),<br>p |
|-----------------------------------|----------------------------------------------------------|
| <b>I. Demographic factors</b>     |                                                          |
| Household income                  | <b>0.96 (.05),<br/>.011</b>                              |
| Parental education                | 1.18 (.12),<br>.55                                       |
| Total household members           | 1.01 (.08),<br>.07                                       |
| <b>II. Clinical factors</b>       |                                                          |
| IQ                                | 0.99 (.01),<br>.45                                       |
| Comorbidity                       | 0.96 (.07),<br>.67                                       |
| ADHD symptom severity             | <b>1.48 (.16),<br/>.019</b>                              |
| <b>III. Family factors</b>        |                                                          |
| <b>Parenting styles</b>           |                                                          |
| Positive parenting                | 0.81 (.20),<br>.33                                       |
| Inconsistent discipline           | 1.26 (.18),<br>.20                                       |
| Low monitoring and supervision    | 1.17 (.19),<br>.40                                       |
| Harsh discipline                  | 0.93 (.16),<br>.69                                       |
| Appropriate discipline            | 0.72 (.19),<br>.09                                       |
| Parental involvement              | 0.95 (.24),<br>.86                                       |
| <b>Parent-child relationships</b> |                                                          |
| Possessive and protective         | 1.69 (.18),<br>.60                                       |
| Affectionate and admiring         | 1.00 (.24),<br>.99                                       |
| Conflicting                       | <b>1.69 (.21),<br/>.01</b>                               |
| Nurturing and intimate            | 1.26 (.26),<br>.38                                       |
| Participating and involved        | 1.05 (.26),<br>.84                                       |
| <b>Parental marital problems</b>  | 1.03 (.08),<br>.72                                       |



**Table S2 Selecting predictors from the clinical factor domain for composite regression models with inclusion of internalizing and externalizing comorbidity as baseline factors<sup>a</sup>**

---

<sup>a</sup> In the main analysis, we used total number of comorbid problems at baseline as a predictor. To assess if type of comorbidity had any influence on adult functioning, we carried out a sensitivity analysis to determine if internalizing (any mood or anxiety disorder) or externalizing (oppositional defiant or conduct disorder) problem affected outcomes. Results from the model selection step for assessing influence of baseline clinical factors on functional outcomes, with internalizing and externalizing comorbidities as predictors, are presented here.

| BASELINE CLINICAL FACTORS          | OUTCOMES                                                      |                                       |                                   |                                   |
|------------------------------------|---------------------------------------------------------------|---------------------------------------|-----------------------------------|-----------------------------------|
|                                    | Occupational functioning                                      |                                       |                                   |                                   |
|                                    | Public assistance<br>OR <sup>b</sup> (SE) <sup>c</sup><br>p   | Job changes<br>OR (SE)<br>p           | Income levels<br>OR (SE)<br>p     |                                   |
| IQ                                 | <b>0.97 (.01),<br/>&lt;.001</b>                               | <b>1.01 (.002),<br/>.001</b>          | <b>1.01 (.004),<br/>&lt;.001</b>  |                                   |
| Any internalizing disorder         | 1.06 (.20),<br>.74                                            | 0.99 (.07),<br>.84                    | 0.88 (.14),<br>.39                |                                   |
| Any externalizing disorder         | 1.05 (.21),<br>.79                                            | 0.92 (.08),<br>.27                    | 0.78 (.15),<br>.11                |                                   |
| ADHD <sup>d</sup> symptom severity | <b>1.44, (.14)<br/>.011</b>                                   | <b>1.21 (.05),<br/>&lt;.001</b>       | 0.96 (.09),<br>.67                |                                   |
|                                    | Emotional functioning                                         |                                       |                                   |                                   |
|                                    | Emotional lability<br>B (SE)<br>p                             | Mood disorders<br>OR (SE)<br>p        | Anxiety disorders<br>OR (SE)<br>p | Neuroticism<br>B (SE)<br>p        |
| IQ                                 | -0.001 (.001),<br>.56                                         | <b>1.02 (.01),<br/>.009</b>           | 0.99 (.01),<br>.63                | <b>-0.01 (.002),<br/>&lt;.001</b> |
| Any internalizing disorder         | 0.16 (.04),<br><.001                                          | .87 (.29),<br>.65                     | 1.29 (.20),<br>.20                | 0.09 (.05),<br>.06                |
| Any externalizing disorder         | 0.18 (.04),<br><.001                                          | 1.01 (.31),<br>.98                    | 0.96 (.22),<br>.86                | 0.10 (.05),<br>.06                |
| ADHD symptom severity              | <b>0.18 (.02),<br/>&lt;.001</b>                               | 1.40 (.20),<br>.09                    | 1.10 (.14),<br>.48                | 0.00 (.03),<br>.99                |
|                                    | Educational attainment<br>(Bachelor's degree)<br>OR (SE)<br>p |                                       |                                   |                                   |
| IQ                                 | <b>1.03 (.01),<br/>&lt;.001</b>                               |                                       |                                   |                                   |
| Any internalizing disorder         | 1.08 (.17),<br>.60                                            |                                       |                                   |                                   |
| Any externalizing disorder         | 0.82 (.19),<br>.31                                            |                                       |                                   |                                   |
| ADHD symptom severity              | <b>0.65 (.12),<br/>.001</b>                                   |                                       |                                   |                                   |
|                                    | Sexual behavior                                               |                                       |                                   |                                   |
|                                    | Age at 1 <sup>st</sup> sexual contact<br>B (SE)<br>p          | Total sexual partners<br>OR (SE)<br>p |                                   |                                   |
| IQ                                 | <b>0.01 (.01),<br/>.038</b>                                   | 0.99 (.002),<br>.15                   |                                   |                                   |

|                            |                                                         |                                |
|----------------------------|---------------------------------------------------------|--------------------------------|
| Any internalizing disorder | -0.36 (.22),<br>.10                                     | 0.93 (.04),<br>.12             |
| Any externalizing disorder | -0.20 (.23),<br>.37                                     | 0.99 (.05),<br>.87             |
| ADHD symptom severity      | <b>-0.46 (.14),<br/>.001</b>                            | <b>1.23 (.03)<br/>&lt;.001</b> |
|                            | Justice involvement<br>(Police contact)<br>OR (SE)<br>p |                                |
| IQ                         | 0.99 (.01)<br>.50                                       |                                |
| Any internalizing disorder | 1.25 (.24),<br>.32                                      |                                |
| Any externalizing disorder | 1.08 (.25),<br>.74                                      |                                |
| ADHD symptom severity      | 1.19 (.17)<br>.08                                       |                                |

<sup>b</sup> Odds ratio

<sup>c</sup> Standard error (of log odds and B values)

<sup>d</sup> Attention-Deficit/Hyperactivity Disorder

**Table S3 Results from regressions of functional outcomes on selected baseline factors controlling for age at follow-up, sex, and MTA site using complete case dataset**

| BASELINE FACTORS                         | OUTCOMES                                 |                             |                                |                      |
|------------------------------------------|------------------------------------------|-----------------------------|--------------------------------|----------------------|
|                                          | Occupational functioning                 |                             |                                |                      |
|                                          | Public assistance<br>OR <sup>a</sup> (p) | Job changes<br>OR (p)       | Income levels<br>OR (p)        |                      |
| <b>Household income</b>                  | .86 (<.001)                              | - <sup>b</sup>              | 1.06 (.040) <sup>c</sup>       |                      |
| <b>Parental education</b>                | -                                        | -                           | -                              |                      |
| <b>Total household members</b>           | -                                        | -                           | -                              |                      |
| <b>IQ</b>                                | .99 (.07)                                | 1.01 (<.001)                | 1.01 (.001)                    |                      |
| <b>Comorbidity</b>                       | -                                        | .98 (.27)                   | .85 (<.001)                    |                      |
| <b>ADHD<sup>d</sup> symptom severity</b> | 1.47 (.007)                              | 1.23 (<.001)                | -                              |                      |
| <b>Parenting styles</b>                  |                                          |                             |                                |                      |
| Positive parenting                       | -                                        | -                           | -                              |                      |
| Inconsistent discipline                  | -                                        | -                           | .92 (.39)                      |                      |
| Low monitoring and supervision           | -                                        | -                           | -                              |                      |
| Harsh discipline                         | 1.18 (.23)                               | -                           | .93 (.37)                      |                      |
| Appropriate discipline                   | -                                        | -                           | -                              |                      |
| Parental involvement                     | -                                        | -                           | -                              |                      |
| <b>Parent-child relationships</b>        |                                          |                             |                                |                      |
| Possessive and protective                | -                                        | -                           | -                              |                      |
| Affectionate and admiring                | -                                        | -                           | 1.23 (.07)                     |                      |
| Conflicting                              | 0.65 (.024)                              | -                           | -                              |                      |
| Nurturing and intimate                   | -                                        | -                           | -                              |                      |
| Participating and involved               | -                                        | -                           | -                              |                      |
| <b>Parental marital problems</b>         | -                                        | -                           | -                              |                      |
|                                          | Emotional functioning                    |                             |                                |                      |
|                                          | Emotional<br>lability<br>B (p)           | Mood<br>disorders<br>OR (p) | Anxiety<br>disorders<br>OR (p) | Neuroticism<br>B (p) |
| <b>Household income</b>                  | -0.004 (.55)                             | -                           | -                              |                      |
| <b>Parental education</b>                | -                                        | -                           | -                              |                      |
| <b>Total household members</b>           | -                                        | -                           | -                              |                      |
| <b>IQ</b>                                | -                                        | 1.01 (.09)                  | -                              | -0.01 (<.001)        |
| <b>Comorbidity</b>                       | 0.06 (<.001)                             | -                           | -                              |                      |
| <b>ADHD symptom severity</b>             | 0.20 (<.001)                             | -                           | -                              |                      |
| <b>Parenting styles</b>                  |                                          |                             |                                |                      |
| Positive parenting                       | -                                        | -                           | -                              |                      |
| Inconsistent discipline                  | -                                        | -                           | -                              |                      |
| Low monitoring and supervision           | -                                        | -                           | -                              |                      |
| Harsh discipline                         | 0.04 (.06)                               | -                           | -                              |                      |
| Appropriate discipline                   | -                                        | -                           | -                              |                      |
| Parental involvement                     | -                                        | -                           | -                              |                      |
| <b>Parent-child relationships</b>        |                                          |                             |                                |                      |
| Possessive and protective                | -                                        | 1.28 (.17)                  | -                              | 0.07 (.023)          |

---

<sup>a</sup> Odds ratio

<sup>b</sup> Blanks represent predictor-outcome associations that were not significant in the model selection step and hence these predictors were not included in the composite models

<sup>c</sup> Not significant after using the False Discovery Rate for multiple testing

<sup>d</sup> Attention-Deficit/Hyperactivity Disorder

|                                                         |            |                                                |                                 |               |
|---------------------------------------------------------|------------|------------------------------------------------|---------------------------------|---------------|
| Affectionate and admiring                               | -          | -                                              | -                               | -0.17 (<.001) |
| Conflicting                                             | -          | -                                              | -                               |               |
| Nurturing and intimate                                  | -          | -                                              | -                               |               |
| Participating and involved                              | -          | -                                              | 1.17 (.28)                      |               |
| <b>Parental marital problems</b>                        | 0.01 (.26) | -                                              | -                               |               |
| Educational attainment<br>(Bachelor's degree)<br>OR (p) |            |                                                |                                 |               |
| <b>Household income</b>                                 |            |                                                | 1.06 (.13)                      |               |
| <b>Parental education</b>                               |            |                                                | 1.66 (<.001)                    |               |
| <b>Total household members</b>                          |            |                                                | -                               |               |
| <b>IQ</b>                                               |            |                                                | 1.01 (.008)                     |               |
| <b>Comorbidity</b>                                      |            |                                                | -                               |               |
| <b>ADHD symptom severity</b>                            |            |                                                | 0.69 (.003)                     |               |
| <b>Parenting styles</b>                                 |            |                                                |                                 |               |
| Positive parenting                                      |            |                                                | -                               |               |
| Inconsistent discipline                                 |            |                                                | -                               |               |
| Low monitoring and supervision                          |            |                                                | 0.77 (.08)                      |               |
| Harsh discipline                                        |            |                                                | -                               |               |
| Appropriate discipline                                  |            |                                                | -                               |               |
| Parental involvement                                    |            |                                                | -                               |               |
| <b>Parent-child relationships</b>                       |            |                                                |                                 |               |
| Possessive and protective                               |            |                                                | -                               |               |
| Affectionate and admiring                               |            |                                                | -                               |               |
| Conflicting                                             |            |                                                | -                               |               |
| Nurturing and intimate                                  |            |                                                | -                               |               |
| Participating and involved                              |            |                                                | -                               |               |
| <b>Parental marital problems</b>                        |            |                                                | -0.38 (.006)                    |               |
| Sexual behavior                                         |            |                                                |                                 |               |
|                                                         |            | Age at 1 <sup>st</sup> sexual contact<br>B (p) | Total sexual partners<br>OR (p) |               |
| <b>Household income</b>                                 |            | 0.13 (.004)                                    | .99 (.047) <sup>1</sup>         |               |
| <b>Parental education</b>                               |            | 0.23 (.041) <sup>1</sup>                       | -                               |               |
| <b>Total household members</b>                          |            | 0.18 (.017)                                    | .91 (<.001)                     |               |
| <b>IQ</b>                                               |            | 0.01 (.40)                                     | .99 (.007)                      |               |
| <b>Comorbidity</b>                                      |            | -                                              | .96 (<.001)                     |               |
| <b>ADHD symptom severity</b>                            |            | -0.47 (<.001)                                  | 1.23 (.001)                     |               |
| <b>Parenting styles</b>                                 |            |                                                |                                 |               |
| Positive parenting                                      |            | 0.21 (.15)                                     | .84 (<.001)                     |               |
| Inconsistent discipline                                 |            | -                                              | .98 (.20)                       |               |
| Low monitoring and supervision                          |            | -                                              | -                               |               |
| Harsh discipline                                        |            | -                                              | -                               |               |
| Appropriate discipline                                  |            | -                                              | .97 (.06)                       |               |
| Parental involvement                                    |            | -                                              | .87 (<.001)                     |               |
| <b>Parent-child relationships</b>                       |            |                                                |                                 |               |
| Possessive and protective                               |            | -0.30 (.039) <sup>1</sup>                      | .92 (<.001)                     |               |
| Affectionate and admiring                               |            | -                                              |                                 |               |

|                                   |                                                   |              |
|-----------------------------------|---------------------------------------------------|--------------|
| Conflicting                       | -                                                 | 1.09 (<.001) |
| Nurturing and intimate            | -                                                 | 1.25 (.001)  |
| Participating and involved        | -                                                 | -            |
| <b>Parental marital problems</b>  | -                                                 | 1.04 (<.001) |
|                                   | Justice involvement<br>(Police contact)<br>OR (p) |              |
| <b>Household income</b>           | .89 (.048) <sup>1</sup>                           |              |
| <b>Parental education</b>         | -                                                 |              |
| <b>Total household members</b>    | .82 (.07)                                         |              |
| <b>IQ</b>                         | -                                                 |              |
| <b>Comorbidity</b>                | -                                                 |              |
| <b>ADHD symptom severity</b>      | -                                                 |              |
| <b>Parenting styles</b>           |                                                   |              |
| Positive parenting                | -                                                 |              |
| Inconsistent discipline           | -                                                 |              |
| Low monitoring and supervision    | -                                                 |              |
| Harsh discipline                  | -                                                 |              |
| Appropriate discipline            | .61 (.015)                                        |              |
| Parental involvement              | -                                                 |              |
| <b>Parent-child relationships</b> |                                                   |              |
| Possessive and protective         | -                                                 |              |
| Affectionate and admiring         | -                                                 |              |
| Conflicting                       | 1.69 (.006)                                       |              |
| Nurturing and intimate            | -                                                 |              |
| Participating and involved        | -                                                 |              |
| <b>Parental marital problems</b>  | -                                                 |              |
